# Supplementary material for: Liquid biopsy approach to monitor the efficacy and response to CAR-T cell therapy
Source: HighWire-hosted journal article supplement (doi:10.1136/jitc-2023-007329), 2024-02-01
Supplement: jitc-2023-007329supp001_data_supplement.pdf [file jitc-2023-007329supp001_data_supplement.pdf]

**Supplemental Material****Supplemental Table 1. Primer sets used for nPCR for CAR transgene detection at the single cell level.**

| Primer Name |         | Sequence                    | Tm (°C) | Product size (bp) |
|-------------|---------|-----------------------------|---------|-------------------|
| STR1 (chr5) | Forward | TTGCAGGAAATGCTGGCATAGAGC    | 68.5    | 486               |
|             | Reverse | TTCTGTAACATTTTGCCACATACGCC  | 66.8    |                   |
| STR2 (chr5) | Forward | TGCAGCCTAATAATTGTTTTCTTTGGG | 66      | 291               |
|             | Reverse | AGATTCACCTTTCATAATGCTGGCAGA | 64.3    |                   |
| STR3 (chrY) | Forward | ACCACTGTA CTGACTGTGATTACAC  | 57.3    | 495               |
|             | Reverse | GCACCTCTTTGGTATCTGAGAAAGT   | 61.3    |                   |
| CAR (outer) | Forward | TCAGGGGTCTCATTACCCGA        | 57.4    | 717               |
|             | Reverse | ATCGTACTCCTCTCTTGGTCCT      | 56.6    |                   |
| CAR (inner) | Forward | GCCATTTACTACTGTGCCAAAC      | 54.5    | 116               |
|             | Reverse | GGATACATAACTCAATTGCGGC      | 54.5    |                   |

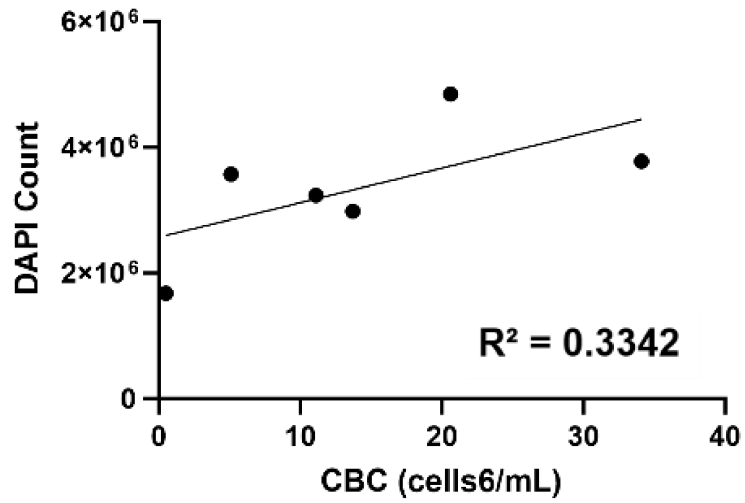

**Supplemental Figure 1. ZUMA-3 patient sample cell adherence.** Correlation plot of total WBC count per cryopreserved sample and DAPI count per slide.

**Supplemental Table 2. ZUMA-3 patient sample information.** \*CBC count taken as a 10ml cellular suspension in PBS.

| Patient #      | Response           | WBC e6/ml* | LYM% | MID% | GRA% |
|----------------|--------------------|------------|------|------|------|
| Z3-103-002-012 | Early Relapse      | 20.6       | 80.4 | 15.0 | 4.6  |
| Z3-103-012-002 | Primary Refractory | 0.5        | 60.4 | 6.9  | 32.7 |
| Z4-103-003-003 | Early Relapse      | 13.7       | 59.4 | 27.4 | 13.2 |
| Z3-103-035-005 | Durable Response   | 5.1        | 84.7 | 8.6  | 6.7  |
| Z3-103-031-006 | Durable Response   | 11.1       | 78.6 | 18.1 | 3.3  |
| Z3-103-002-011 | Primary Refractory | 34.1       | 75.9 | 19.1 | 5    |
